# Supplementary material
Source: publisher figshare collection journal article supplement (https://acs.figshare.com/ndownloader/files/12188741)
Supplement: Supplementary file 1 [file 12188741]

## Sheet: Run1
Supplementary Table S2. List of the O-glycopeptides identified from bovine fetuin using O-GIG. Fetuin was digested by trypsin, followed by HILIC enrichment. The maximum missed-cleveage = 1
O-glycopeptide	O-glycan	Glycosite	Abundance
D.tEQAALAAVDYInK.H	HexNAc(1)Hex(1)NeuAc(1)	37	2.04353e-06
K.HtLNQID.S	HexNAc(1)Hex(1)Fuc(1)	59	6.36218e-06
H.tLnQID.S	HexNAc(3)	59	1.0531e-06
D.sVK.V	HexNAc(3)Hex(2)Fuc(1)	65	0.000261026
D.sVK.V	HexNAc(2)Hex(2)NeuAc(2)	65	4.5775e-06
D.sVK.V	HexNAc(3)Hex(1)NeuAc(1)	65	2.316e-06
D.sVKVWPR.R	HexNAc(2)Hex(3)NeuAc(1)	65	1.70294e-06
D.sVKVWPR.R	HexNAc(1)Hex(1)NeuGc(1)NeuAc(1)	65	5.66738e-06
H.TLNQIDsVK.V	HexNAc(1)Hex(1)Fuc(1)	65	3.25602e-07
R.PtGEVYDIEID.T	HexNAc(3)Hex(2)NeuAc(2)	74	2.20701e-06
D.TLEt.T	HexNAc(2)Hex(1)Fuc(1)	87	2.09802e-06
C.sVR.Q	HexNAc(3)Hex(2)	101	1.29832e-06
C.sVR.Q	HexNAc(2)Hex(1)Fuc(1)	101	2.97537e-06
C.sVR.Q	HexNAc(1)Hex(1)NeuGc(1)	101	5.29954e-07
C.sVR.Q	HexNAc(1)	101	4.16879e-07
C.sVR.Q	HexNAc(3)Hex(1)Fuc(1)	101	1.00133e-07
F.sVLFTK.C	HexNAc(1)	126	1.19342e-05
F.SVLFtK.C	HexNAc(3)Hex(1)Fuc(2)	130	0.000136235
F.SVLFtK.C	HexNAc(3)Hex(2)Fuc(1)NeuAc(1)	130	1.06808e-06
S.sPDSAEDVR.K	HexNAc(2)Hex(2)	135	7.73815e-08
D.sAEDVR.K	HexNAc(3)Fuc(1)	138	5.34042e-05
D.sAEDVR.K	HexNAc(1)Hex(1)Fuc(1)NeuGc(1)	138	2.7029e-05
D.sR.V	HexNAc(3)Hex(2)Fuc(2)	158	7.62916e-06
D.sR.V	HexNAc(3)Hex(3)Fuc(1)	158	3.00398e-05
K.LCPDCPLLAPLNDsR.V	HexNAc(1)	158	2.7465e-05
D.sR.V	HexNAc(2)Hex(1)Fuc(1)NeuGc(1)	158	6.53928e-06
K.LCPDCPLLAPLNDsR.V	HexNAc(2)	158	4.48213e-07
R.AQFVPLPVsV.S	HexNAc(3)Hex(1)Fuc(2)	196	0.00159899
R.AQFVPLPVsV.S	HexNAc(1)Hex(1)	196	8.72449e-05
R.AQFVPLPVsV.S	HexNAc(4)Hex(1)Fuc(1)	196	9.3866e-05
A.tDCIAK.E	HexNAc(2)Hex(1)NeuAc(2)	206	6.56653e-06
A.tDCIAK.E	HexNAc(1)Hex(1)	206	3.22877e-06
K.EVVDPtK.C	HexNAc(2)	217	2.34324e-06
K.EVVDPtK.C	HexNAc(1)Hex(1)Fuc(1)NeuAc(1)	217	2.15251e-06
K.EVVDPtK.C	HexNAc(4)Hex(1)	217	4.76823e-06
K.eVVDPtK.C	HexNAc(2)Hex(2)	217	9.25036e-07
K.GsVIQK.A	HexNAc(2)Hex(1)Fuc(2)	233	0.000431211
K.GsVIQK.A	HexNAc(4)Hex(3)Fuc(2)	233	9.37297e-06
G.sVIQK.A	HexNAc(2)Hex(1)Fuc(1)	233	3.39907e-05
K.GsVIQK.A	HexNAc(2)Hex(1)NeuGc(1)	233	1.86642e-06
G.sVIQK.A	HexNAc(2)Hex(1)Fuc(1)NeuGc(1)	233	4.82272e-07
G.sVIQK.A	HexNAc(1)Hex(1)NeuAc(1)	233	3.02442e-08
R.VtC.T	HexNAc(1)Hex(1)NeuGc(1)NeuAc(1)	247	4.78185e-06
R.VtC.T	HexNAc(3)Hex(2)	247	1.10078e-06
P.sAVPDAAGP.T	HexNAc(1)Hex(1)NeuAc(1)	271	0.00317809
P.sAVPDAAGPTP.S	HexNAc(2)Hex(2)NeuAc(2)	271	0.00419713
P.sAVPDAAGPTP.S	HexNAc(2)Hex(2)NeuAc(1)	271	0.000815231
P.sAVPDAAGP.T	HexNAc(1)Hex(1)	271	0.000282851
P.sAVPDAAGP.T	HexNAc(1)	271	1.70975e-05
P.sAVPDAAGPTP.S	HexNAc(2)Hex(2)	271	1.78195e-05
Q.TQPVIPQPQPDGAEAEAPsAVPDAAGP.T	HexNAc(1)Hex(1)NeuAc(2)	271	9.97241e-06
P.sAVPDAAGP.T	HexNAc(1)Hex(1)NeuGc(1)	271	8.99152e-06
P.sAVPDAAGP.T	HexNAc(3)Hex(3)Fuc(1)NeuAc(1)	271	4.83635e-07
P.SAVPDAAGPtP.S	HexNAc(2)Hex(2)NeuAc(2)	280	0.00419713
P.SAVPDAAGPtP.S	HexNAc(2)Hex(2)NeuAc(1)	280	0.000815231
P.tPSAAGPPVA.S	HexNAc(1)Hex(1)NeuAc(1)	280	0.000313477
P.tPSAAGPPVA.S	HexNAc(1)Hex(1)	280	2.59392e-05
P.SAVPDAAGPtP.S	HexNAc(2)Hex(2)	280	1.78195e-05
P.sAAGPPVASVVVGP.S	HexNAc(1)Hex(1)NeuAc(1)	282	0.000539491
P.sAAGPPVA.S	HexNAc(1)Hex(1)NeuAc(1)	282	0.000342291
P.sAAGPPVASVVVGP.S	HexNAc(1)Hex(1)	282	7.79265e-05
P.TPsAAGPPVA.S	HexNAc(1)Hex(1)	282	2.59392e-05
P.TPsAAGPPVA.S	HexNAc(2)Hex(2)NeuAc(1)	282	1.11577e-06
P.TPsAAGPPVA.S	HexNAc(2)Hex(2)NeuAc(2)	282	3.01488e-06
A.sVVVGPSVVAVPLPLHR.A	HexNAc(1)Hex(1)NeuAc(1)	290	0.00120843
A.sVVVGPSVVAVPLPLHR.A	HexNAc(2)Hex(2)NeuAc(2)	290	7.5338e-05
P.SAAGPPVAsVVVGP.S	HexNAc(1)Hex(1)NeuAc(1)	290	0.000539491
A.sVVVGP.S	HexNAc(1)Hex(1)Fuc(1)	290	7.41119e-05
P.SAAGPPVAsVVVGP.S	HexNAc(1)Hex(1)	290	7.79265e-05
A.sVVVGPSVVAVPLPLHR.A	HexNAc(1)Hex(1)	290	2.39774e-05
A.SVVVGPsVVAVPLPLHR.A	HexNAc(1)Hex(1)NeuAc(1)	296	0.00120843
P.sVVAVPLPLHR.A	HexNAc(1)Hex(1)NeuAc(1)	296	0.000542692
P.sVVAVPLPLHR.A	HexNAc(1)	296	0.000101304
P.sVVAVPLPLHR.A	HexNAc(1)Hex(1)	296	0.000115936
A.SVVVGPsVVAVPLPLHR.A	HexNAc(2)Hex(2)NeuAc(2)	296	7.5338e-05
A.SVVVGPsVVAVPLPLHR.A	HexNAc(1)Hex(1)	296	2.39774e-05
A.SVVVGPsVVAVPLPLHR.A	HexNAc(1)Hex(1)NeuAc(2)	296	7.52018e-07
H.tF.S	HexNAc(1)Hex(2)Fuc(1)	314	5.23143e-06
R.HtF.S	HexNAc(1)	314	1.4114e-05
R.HtF.S	HexNAc(1)Hex(1)Fuc(1)	314	1.18252e-05
R.HtF.S	HexNAc(1)Hex(1)	314	2.45223e-07
A.sVES.S	HexNAc(5)Hex(3)Fuc(1)NeuAc(1)	320	4.12792e-06
S.sGEAFHVGK.T	HexNAc(2)Hex(1)	325	1.20841e-06
K.tPIVGQPSIPGGPVR.L	HexNAc(1)Hex(1)NeuAc(1)	334	0.00285436
K.tPIVGQP.S	HexNAc(2)Hex(1)Fuc(1)	334	1.26562e-06
K.tPIVGQP.S	HexNAc(1)Hex(1)NeuAc(1)	334	9.72718e-07
K.tPIVGQP.S	HexNAc(3)Hex(1)Fuc(1)	334	3.10616e-07
K.TPIVGQPsIPGGPVR.L	HexNAc(1)Hex(1)NeuAc(1)	341	0.00285436
P.sIPGGPVR.L	HexNAc(1)Hex(1)NeuAc(1)	341	0.000250128
K.TPIVGQPsIPGGPVR.L	HexNAc(1)Hex(1)	341	5.08838e-05
K.TPIVGQPsIPGGPVR.L	HexNAc(1)Hex(1)NeuAc(2)	341	3.63502e-05
P.sIPGGPVR.L	HexNAc(1)Hex(1)	341	2.17431e-05
K.TPIVGQPsIPGGPVR.L	HexNAc(2)Hex(3)Fuc(1)	341	2.09802e-06
P.sIPGGPVR.L	HexNAc(4)Hex(1)	341	4.45761e-06

## Sheet: Run2
O-glycopeptide	O-glycan	Glycosite	Abundance
K.sFVLLFCLAQLWGCH.S	HexNAc(1)Hex(1)	3	7.04184e-07
D.tEQAALAAVDYInK.H	HexNAc(1)Hex(1)NeuAc(1)	37	2.47873e-06
H.tLNQID.S	HexNAc(2)Hex(1)NeuGc(1)	59	5.81656e-06
D.sVK.V	HexNAc(2)Hex(3)	65	5.63347e-05
D.sVK.V	HexNAc(2)Hex(2)NeuAc(2)	65	5.32363e-06
D.sVKVWPR.R	HexNAc(3)Hex(2)	65	4.76028e-06
D.sVKVWPR.R	HexNAc(2)Hex(3)NeuAc(1)	65	1.11261e-05
R.PtGEVYDIEID.T	HexNAc(3)Hex(2)NeuAc(2)	74	2.12664e-06
P.tPLANCSVR.Q	HexNAc(2)Hex(1)Fuc(2)NeuGc(1)	95	2.36324e-06
C.sVRQQ.T	HexNAc(2)	101	5.99965e-06
P.TPLANCsVR.Q	HexNAc(2)Hex(1)Fuc(2)NeuGc(1)	101	2.36324e-06
K.QDGQFsVLF.T	HexNAc(1)Hex(1)Fuc(1)	126	6.33765e-05
F.sVLFTK.C	HexNAc(1)	126	5.80247e-06
K.QDGQFsVLF.T	HexNAc(1)Hex(1)NeuAc(3)	126	2.1548e-06
F.sVLFTK.C	HexNAc(2)Hex(1)NeuGc(1)	126	4.21384e-06
F.SVLFtK.C	HexNAc(1)	130	5.80247e-06
F.SVLFtK.C	HexNAc(3)Hex(1)Fuc(2)	130	1.40133e-05
D.sAEDVR.K	HexNAc(3)Fuc(1)	138	1.06613e-05
D.sAEDVR.K	HexNAc(1)Hex(1)Fuc(1)NeuGc(1)	138	2.7942e-05
D.sAEDVR.K	HexNAc(1)Hex(1)Fuc(1)NeuAc(1)	138	3.94343e-06
D.sAEDVR.K	HexNAc(1)Hex(1)Fuc(1)	138	1.75342e-05
D.sR.V	HexNAc(3)Hex(3)Fuc(1)	158	0.000302799
D.sR.V	HexNAc(2)Hex(2)Fuc(3)	158	1.53512e-05
D.sR.V	HexNAc(3)Hex(2)Fuc(2)	158	1.57737e-06
D.sR.V	HexNAc(2)Hex(1)Fuc(1)NeuGc(1)	158	1.57737e-06
D.sR.V	HexNAc(2)Hex(1)NeuAc(2)	158	7.18268e-07
A.tFnAE.S	HexNAc(3)	170	1.9858e-06
R.AQFVPLPVsV.S	HexNAc(3)Hex(1)NeuAc(1)	196	5.42222e-05
R.AQFVPLPVsV.S	HexNAc(4)Hex(1)Fuc(1)	196	0.000107036
R.AQFVPLPVsV.S	HexNAc(3)Hex(1)Fuc(2)	196	0.000463916
R.AQFVPLPVsV.S	HexNAc(1)Hex(1)	196	1.67596e-06
V.SVsVEFAVAA.T	HexNAc(4)Hex(1)Fuc(1)	198	1.67596e-06
A.tDCIAK.E	HexNAc(2)Hex(2)	206	1.52104e-07
K.EVVDPtK.C	HexNAc(2)	217	2.0703e-06
K.EVVDPtK.C	HexNAc(3)Fuc(1)	217	1.85905e-06
K.EVVDPtK.C	HexNAc(4)Hex(3)Fuc(1)	217	5.87289e-08
K.EVVDPtK.C	HexNAc(2)Hex(1)Fuc(1)NeuGc(1)	217	9.98533e-09
K.eVVDPtK.C	HexNAc(2)Hex(2)Fuc(1)	217	2.16889e-06
K.eVVDPtK.C	HexNAc(2)Hex(2)	217	6.95734e-07
K.GsVIQK.A	HexNAc(2)Hex(1)Fuc(2)	233	0.00040361
G.sVIQK.A	HexNAc(2)Hex(1)Fuc(1)	233	4.92365e-05
K.GsVIQK.A	HexNAc(2)Hex(1)	233	3.29558e-06
K.GsVIQK.A	HexNAc(2)Hex(1)NeuGc(1)	233	3.12658e-06
G.sVIQK.A	HexNAc(2)Hex(1)Fuc(2)NeuGc(1)	233	9.43606e-06
K.GsVIQK.A	HexNAc(4)Hex(2)	233	8.14037e-07
K.GsVIQK.A	HexNAc(3)Hex(1)	233	5.63347e-07
R.VtC.T	HexNAc(1)Hex(1)	247	0.000202805
C.tLFQ.T	HexNAc(1)Hex(1)	249	1.64779e-06
P.sAVPDAAGP.T	HexNAc(1)Hex(1)NeuAc(1)	271	0.00306616
P.sAVPDAAGPTP.S	HexNAc(2)Hex(2)NeuAc(2)	271	0.00410356
P.sAVPDAAGPTP.S	HexNAc(2)Hex(2)NeuAc(1)	271	0.000978816
P.sAVPDAAGP.T	HexNAc(1)Hex(1)	271	0.000279265
P.sAVPDAAGP.T	HexNAc(1)	271	1.73229e-05
P.sAVPDAAGPTP.S	HexNAc(2)Hex(2)	271	1.55484e-05
P.sAVPDAAGP.T	HexNAc(1)Hex(1)NeuGc(1)	271	1.01543e-05
P.SAVPDAAGPtP.S	HexNAc(2)Hex(2)NeuAc(2)	280	0.00410356
P.SAVPDAAGPtP.S	HexNAc(2)Hex(2)NeuAc(1)	280	0.000978816
P.tPSAAGPPVA.S	HexNAc(1)Hex(1)NeuAc(1)	280	0.000303926
P.tPSAAGPPVA.S	HexNAc(1)Hex(1)	280	2.74913e-05
P.SAVPDAAGPtP.S	HexNAc(2)Hex(2)	280	1.55484e-05
P.sAAGPPVA.S	HexNAc(1)Hex(1)NeuAc(1)	282	0.000337797
P.sAAGPPVASVVVGP.S	HexNAc(1)Hex(1)NeuAc(1)	282	0.000433777
P.sAAGPPVASVVVGP.S	HexNAc(1)Hex(1)	282	4.33777e-05
P.TPsAAGPPVA.S	HexNAc(1)Hex(1)	282	2.74913e-05
P.TPsAAGPPVA.S	HexNAc(2)Hex(2)NeuAc(2)	282	2.03087e-06
A.sVVVGPSVVAVPLPLHR.A	HexNAc(1)Hex(1)NeuAc(1)	290	0.00110681
A.sVVVGPSVVAVPLPLHR.A	HexNAc(2)Hex(2)NeuAc(2)	290	7.51505e-05
P.SAAGPPVAsVVVGP.S	HexNAc(1)Hex(1)NeuAc(1)	290	0.000433777
A.sVVVGP.S	HexNAc(1)Hex(1)Fuc(1)	290	1.94355e-05
P.SAAGPPVAsVVVGP.S	HexNAc(1)Hex(1)	290	4.33777e-05
A.sVVVGPSVVAVPLPLHR.A	HexNAc(1)Hex(1)	290	2.14072e-05
A.SVVVGPsVVAVPLPLHR.A	HexNAc(1)Hex(1)NeuAc(1)	296	0.00110681
P.sVVAVPLPLHR.A	HexNAc(1)Hex(1)NeuAc(1)	296	0.00048914
P.sVVAVPLPLHR.A	HexNAc(1)	296	9.48395e-05
P.sVVAVPLPLHR.A	HexNAc(1)Hex(1)	296	0.00010643
A.SVVVGPsVVAVPLPLHR.A	HexNAc(2)Hex(2)NeuAc(2)	296	7.51505e-05
A.SVVVGPsVVAVPLPLHR.A	HexNAc(1)Hex(1)	296	2.14072e-05
A.SVVVGPsVVAVPLPLHR.A	HexNAc(1)Hex(1)NeuAc(2)	296	3.18854e-06
R.HtF.S	HexNAc(1)	314	0.000305475
H.tF.S	HexNAc(3)Hex(1)NeuAc(1)	314	0.000107036
R.HtF.S	HexNAc(1)Hex(1)Fuc(1)	314	1.27176e-05
F.sGVA.S	HexNAc(1)	316	9.15439e-06
A.SVEs.S	HexNAc(1)	323	4.76028e-05
S.sGEAFHVGK.T	HexNAc(2)	325	1.0267e-06
S.sGEAFHVGK.T	HexNAc(2)Hex(1)	325	3.68992e-07
K.tPIVGQPSIPGGPVR.L	HexNAc(1)Hex(1)NeuAc(1)	334	0.0026721
K.tPIVGQPSIPGGPVR.L	HexNAc(1)Hex(1)	334	4.47016e-05
K.tPIVGQP.S	HexNAc(3)Hex(2)Fuc(4)	334	1.26049e-06
K.tPIVGQP.S	HexNAc(1)Hex(1)NeuAc(1)	334	4.25468e-06
K.TPIVGQPsIPGGPVR.L	HexNAc(1)Hex(1)NeuAc(1)	341	0.0026721
P.sIPGGPVR.L	HexNAc(1)Hex(1)NeuAc(1)	341	0.000223085
K.TPIVGQPsIPGGPVR.L	HexNAc(1)Hex(1)	341	4.47016e-05
K.TPIVGQPsIPGGPVR.L	HexNAc(1)Hex(1)NeuAc(2)	341	4.17708e-05
P.sIPGGPVR.L	HexNAc(3)Hex(1)Fuc(1)NeuGc(1)	341	4.0561e-06
P.sIPGGPVR.L	HexNAc(1)Hex(1)	341	2.1717e-05
P.sIPGGPVRLCPGR.I	HexNAc(1)Hex(1)NeuAc(1)	341	1.26471e-06
P.sIPGGPVR.L	HexNAc(4)Hex(1)	341	6.00669e-06
P.sIPGGPVR.L	HexNAc(3)Hex(1)	341	1.08303e-06

## Sheet: Run3
O-glycopeptide	O-glycan	Glycosite	Abundance
H.tLnQID.S	HexNAc(3)	59	1.03696e-06
K.HtLnQID.S	HexNAc(3)	59	8.61135e-07
D.sVK.V	HexNAc(3)Hex(2)Fuc(1)	65	0.000251418
D.sVK.V	HexNAc(1)Hex(1)Fuc(1)	65	1.1048e-05
D.sVK.V	HexNAc(2)Hex(3)	65	6.27161e-06
D.sVKVWPR.R	HexNAc(2)Hex(3)NeuAc(1)	65	8.14064e-06
D.sVK.V	HexNAc(3)Hex(1)NeuAc(1)	65	1.6752e-06
H.TLNQIDsVK.V	HexNAc(4)Hex(2)	65	1.05081e-06
D.tLET.T	HexNAc(2)Hex(1)Fuc(1)	84	1.56444e-06
C.sVR.Q	HexNAc(2)	101	1.39831e-05
C.sVRQQ.T	HexNAc(1)Hex(1)Fuc(1)NeuAc(1)	101	2.35359e-06
F.sVLF.T	HexNAc(1)	126	1.24602e-05
F.sVLFTK.C	HexNAc(2)Hex(1)NeuGc(1)	126	7.83606e-07
F.SVLFtK.C	HexNAc(3)Hex(1)Fuc(2)	130	0.000116156
F.SVLFtK.C	HexNAc(1)	130	2.24283e-06
F.SVLFtK.C	HexNAc(3)Hex(1)NeuAc(1)	130	2.48926e-06
K.cDs.S	HexNAc(3)	134	7.79452e-06
D.SsPD.S	HexNAc(3)Hex(2)	135	1.08265e-06
D.sAEDVR.K	HexNAc(3)Fuc(1)	138	3.511e-05
D.sAEDVR.K	HexNAc(3)Hex(1)Fuc(1)	138	4.79024e-07
D.sR.V	HexNAc(2)Hex(1)NeuGc(1)	158	8.63904e-05
D.sR.V	HexNAc(3)Hex(3)Fuc(1)	158	1.79426e-05
K.LCPDCPLLAPLNDsR.V	HexNAc(1)	158	1.57829e-05
D.sR.V	HexNAc(2)Hex(2)NeuAc(1)	158	1.43984e-06
G.sYLQLVEISR.A	HexNAc(1)Hex(1)Fuc(1)	178	1.73058e-06
R.AQFVPLPVsV.S	HexNAc(3)Hex(1)Fuc(2)	196	0.00152609
R.AQFVPLPVsV.S	HexNAc(1)Hex(1)	196	6.19824e-05
R.AQFVPLPVsV.S	HexNAc(2)Hex(1)NeuAc(1)	196	1.6752e-06
A.tDCIAK.E	HexNAc(2)Hex(1)NeuAc(2)	206	5.84243e-06
K.EVVDPtK.C	HexNAc(2)	217	1.61982e-06
K.EVVDPtK.C	HexNAc(2)Hex(1)Fuc(2)	217	3.98725e-07
K.eVVDPtK.C	HexNAc(4)Hex(2)Fuc(2)	217	3.04582e-06
K.eVVDPtK.C	HexNAc(2)Hex(3)	217	1.0245e-07
K.GsVIQK.A	HexNAc(2)Hex(1)Fuc(2)	233	0.000189616
G.sVIQK.A	HexNAc(3)Hex(1)Fuc(1)	233	7.66992e-06
G.sVIQK.A	HexNAc(2)Hex(1)Fuc(1)	233	5.34402e-05
K.GsVIQK.A	HexNAc(2)Hex(1)	233	2.78277e-06
G.sVIQK.A	HexNAc(2)Hex(1)Fuc(2)	233	1.7998e-06
C.tLFQ.T	HexNAc(1)Hex(1)NeuGc(2)	249	0.000159213
P.sAVPDAAGP.T	HexNAc(1)Hex(1)NeuAc(1)	271	0.00215007
P.sAVPDAAGPTP.S	HexNAc(2)Hex(2)NeuAc(2)	271	0.00362466
P.sAVPDAAGPTP.S	HexNAc(2)Hex(2)NeuAc(1)	271	0.000724351
P.sAVPDAAGP.T	HexNAc(1)Hex(1)	271	0.000243278
P.sAVPDAAGP.T	HexNAc(1)	271	2.65817e-05
Q.TQPVIPQPQPDGAEAEAPsAVPDAAGP.T	HexNAc(1)Hex(1)NeuAc(2)	271	2.43665e-06
P.sAVPDAAGPTP.S	HexNAc(2)Hex(2)	271	1.49245e-05
P.sAVPDAAGP.T	HexNAc(1)Hex(1)NeuGc(1)	271	9.96813e-06
P.sAVPDAAGP.T	HexNAc(3)Hex(3)Fuc(1)NeuAc(1)	271	5.524e-07
P.SAVPDAAGPtP.S	HexNAc(2)Hex(2)NeuAc(2)	280	0.00362466
P.SAVPDAAGPtP.S	HexNAc(2)Hex(2)NeuAc(1)	280	0.000724351
P.tPSAAGPPVA.S	HexNAc(1)Hex(1)NeuAc(1)	280	0.00025391
P.tPSAAGPPVA.S	HexNAc(1)Hex(1)	280	2.00609e-05
P.SAVPDAAGPtP.S	HexNAc(2)Hex(2)	280	1.49245e-05
P.sAAGPPVASVVVGP.S	HexNAc(1)Hex(1)NeuAc(1)	282	0.000373805
P.sAAGPPVA.S	HexNAc(1)Hex(1)NeuAc(1)	282	0.000314494
P.TPsAAGPPVA.S	HexNAc(1)Hex(1)NeuAc(1)	282	0.00025391
P.sAAGPPVASVVVGP.S	HexNAc(1)Hex(1)	282	4.3306e-05
P.TPsAAGPPVA.S	HexNAc(1)Hex(1)	282	2.00609e-05
A.sVVVGPSVVAVPLPLHR.A	HexNAc(1)Hex(1)NeuAc(1)	290	0.000961748
P.SAAGPPVAsVVVGP.S	HexNAc(1)Hex(1)NeuAc(1)	290	0.000373805
P.SAAGPPVAsVVVGP.S	HexNAc(1)Hex(1)	290	4.3306e-05
A.sVVVGPSVVAVPLPLHR.A	HexNAc(1)Hex(1)	290	1.2114e-05
A.sVVVGPSVVAVPLPLHR.A	HexNAc(1)Hex(1)NeuAc(2)	290	7.12998e-07
A.SVVVGPsVVAVPLPLHR.A	HexNAc(1)Hex(1)NeuAc(1)	296	0.000961748
P.sVVAVPLPLHR.A	HexNAc(1)Hex(1)NeuAc(1)	296	0.000410687
P.sVVAVPLPLHR.A	HexNAc(1)	296	8.37738e-05
P.sVVAVPLPLHR.A	HexNAc(1)Hex(1)	296	8.376e-05
A.SVVVGPsVVAVPLPLHR.A	HexNAc(2)Hex(2)NeuAc(2)	296	1.97978e-05
A.SVVVGPsVVAVPLPLHR.A	HexNAc(1)Hex(1)	296	1.2114e-05
R.HtF.S	HexNAc(1)	314	0.000204347
R.HtF.S	HexNAc(1)Hex(1)Fuc(1)	314	1.04665e-05
R.HtF.S	HexNAc(2)Hex(1)NeuAc(1)	314	7.36534e-07
A.sVES.S	HexNAc(4)Hex(1)	320	6.27161e-06
A.SVEs.S	HexNAc(1)	323	3.51653e-05
A.SVEs.S	HexNAc(5)Hex(3)Fuc(1)NeuAc(1)	323	1.45645e-05
A.SVEs.S	HexNAc(3)Hex(3)NeuAc(1)	323	9.99582e-08
S.sGEAFHVGK.T	HexNAc(3)Hex(2)Fuc(2)	325	2.07669e-06
K.tPIVGQPSIPGGPVR.L	HexNAc(1)Hex(1)NeuAc(1)	334	0.00233379
K.tPIVGQPSIPGGPVR.L	HexNAc(2)Hex(2)NeuAc(2)	334	5.28865e-07
K.TPIVGQPsIPGGPVR.L	HexNAc(1)Hex(1)NeuAc(1)	341	0.00233379
P.sIPGGPVR.L	HexNAc(1)Hex(1)NeuAc(1)	341	0.000187733
K.TPIVGQPsIPGGPVR.L	HexNAc(1)Hex(1)	341	4.81654e-05
K.TPIVGQPsIPGGPVR.L	HexNAc(1)Hex(1)NeuAc(2)	341	3.43624e-05
P.sIPGGPVR.L	HexNAc(1)Hex(1)	341	2.28713e-05
P.sIPGGPVR.L	HexNAc(6)Hex(4)Fuc(2)	341	1.41215e-06
P.sIPGGPVRLCPGR.I	HexNAc(2)Hex(2)Fuc(3)	341	1.02727e-06
P.sIPGGPVR.L	HexNAc(4)Hex(1)	341	9.08207e-07
